# Supplementary material for: Structural and electrochemical insights into novel Wadsley Roth Nb7Ti1.5Mo1.5O25 and Ta7Ti1.5Mo1.5O25 anodes for Li-ion battery application
Source: Royal Society of Chemistry journal article supplement (doi:10.1039/d3dt02144k), 2023-01-01
Supplement: d3dt02144k1.pdf [file d3dt02144k1.pdf]

## Supporting Information

Structural and Electrochemical Insights into novel Nb<sub>7</sub>Ti<sub>1.5</sub>Mo<sub>1.5</sub>O<sub>25</sub>  
and Ta<sub>7</sub>Ti<sub>1.5</sub>Mo<sub>1.5</sub>O<sub>25</sub> anodes for High-Power Li-ion Battery Application

A. J. Green<sup>\*1</sup>, E. H. Driscoll<sup>2</sup>, Y. Lakhdar<sup>2</sup>, E. Kendrick<sup>2</sup>, P. R. Slater<sup>\*1</sup>

<sup>1</sup>School of Chemistry, University of Birmingham, Edgbaston, Birmingham, B15 2TT, UK

<sup>2</sup>School of Metallurgy and Materials, University of Birmingham, Edgbaston, Birmingham, B15 2SE,  
UK

Correspondence to:

Alex Green/Prof. Peter Slater

School of Chemistry,

The University of Birmingham,

Edgbaston,

B15 2TT,

United Kingdom.

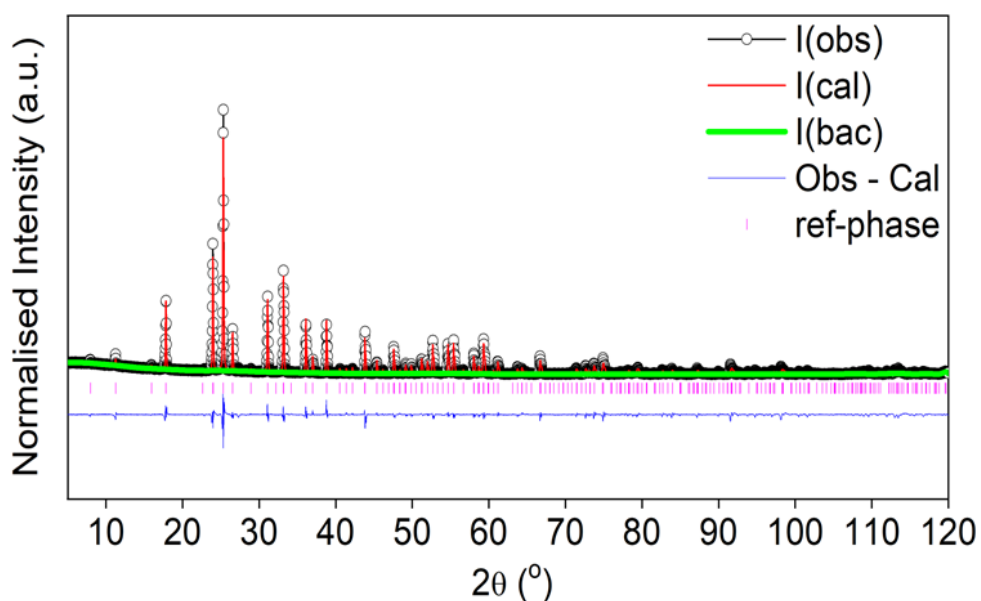

SI Figure 1: Observed, calculated and difference XRD profiles for TTMO71515 ( $R_{wp} = 9.51\%$ ,  $R_p = 6.25\%$ ) (Cu  $K\alpha$ ) through a Rietveld refinement on GSAS II.

SI Table 1: Refined structural parameters for NTMO71515. Due to the presence of multiple cations, including isoelectronic  $Nb^{5+}$  and  $Mo^{6+}$ , and low X-ray scattering of the oxygen, the refinement was conducted in stages – with the starting point involving all octahedral cation sites set to  $Nb^{5+}$ , with  $Mo^{6+}$  in the tetrahedral site (due to the known greater preference of  $Mo^{6+}$  for tetrahedral coordination). Sites which showed low Nb content were then assumed to be occupied by Ti. Note to match the sample formula, some Mo must also be on the other Nb sites (site 2-4), but the value was not possible to refine due to the fact that  $Mo^{6+}$  and  $Nb^{5+}$  are isoelectronic and so possess the same X-ray scattering factor.

| Cation Site | Label | Multiplicity | x          | y          | z         | Fraction   | $U_{iso}$ |
|-------------|-------|--------------|------------|------------|-----------|------------|-----------|
| Site 1      | Ti1   | 2            | 0.00000    | 0.50000    | 0.2500    | 0.078 (11) | 0.02000   |
|             | Mo1   | 2            | 0.00000    | 0.50000    | 0.2500    | 0.922 (11) | 0.02000   |
| Site 2      | Ti2   | 2            | 0.00000    | 0.00000    | 0.00000   | 0.088 (10) | 0.02000   |
|             | Nb2   | 2            | 0.00000    | 0.00000    | 0.00000   | 0.912 (10) | 0.02000   |
| Site 3      | Ti3   | 8            | 0.2209 (6) | 0.1015 (5) | 0.037 (3) | 0.043 (4)  | 0.02000   |
|             | Nb3   | 8            | 0.2209 (6) | 0.1015 (5) | 0.037 (3) | 0.957 (4)  | 0.02000   |
| Site 4      | Ti4   | 8            | 0.1331 (5) | 0.3164 (5) | 0.973 (3) | 0.204 (9)  | 0.02000   |
|             | Nb4   | 8            | 0.1331 (5) | 0.3164 (5) | 0.973 (3) | 0.796 (9)  | 0.02000   |
|             | O1    | 2            | 0.00000    | 0.00000    | 0.50000   | 1.000      | 0.02000   |
|             | O2    | 8            | 0.257 (2)  | 0.387 (4)  | -0.01 (2) | 1.000      | 0.02000   |
|             | O3    | 8            | 0.110 (3)  | 0.055 (3)  | 0.03 (2)  | 1.000      | 0.02000   |
|             | O4    | 8            | 0.222 (4)  | 0.114 (4)  | 0.69 (1)  | 1.000      | 0.02000   |
|             | O5    | 8            | 0.028 (2)  | 0.272 (2)  | 1.00 (2)  | 1.000      | 0.02000   |
|             | O6    | 8            | 0.061 (2)  | 0.457 (4)  | 0.94 (1)  | 1.000      | 0.02000   |
|             | O7    | 8            | 0.793 (2)  | 0.379 (3)  | 0.06 (2)  | 1.000      | 0.02000   |

SI Table 2: Refined structural parameters for TTMO71515. Note to match the sample formula, some Mo must also be on the other Ta sites (site 2-4) but given the presence of 3 elements on these sites (Ta/Mo/Ti) it was not possible to refine all three together. Therefore, the reported Ti/Ta occupancies should be treated as simply guidelines for the relative distribution over the sites.

| Cation Site | Label | Multiplicity | x          | y          | z          | Fraction | U <sub>iso</sub> |
|-------------|-------|--------------|------------|------------|------------|----------|------------------|
| Site 1      | Mo1   | 2            | 0.00000    | 0.50000    | 0.2500     | 0.98 (2) | 0.02000          |
|             | Ti1   | 2            | 0.00000    | 0.50000    | 0.2500     | 0.02 (2) | 0.02000          |
| Site 2      | Ta2   | 2            | 0.00000    | 0.00000    | 0.0000     | 1.000    | 0.02000          |
| Site 3      | Ti3   | 8            | 0.2234 (6) | 0.0944 (4) | 0.009 (5)  | 0.27 (1) | 0.02000          |
|             | Ta3   | 8            | 0.2234 (6) | 0.0944 (4) | 0.009 (5)  | 0.73 (1) | 0.02000          |
| Site 4      | Ti4   | 8            | 0.1277 (5) | 0.3180 (5) | 0.99 (4)   | 0.20 (1) | 0.02000          |
|             | Ta4   | 8            | 0.1277 (5) | 0.3180 (5) | 0.99 (4)   | 0.80 (1) | 0.02000          |
|             | O1    | 2            | 0.00000    | 0.00000    | 0.50000    | 1.000    | 0.02000          |
|             | O2    | 8            | 0.300 (4)  | 0.367 (4)  | 0.44 (2)   | 1.000    | 0.02000          |
|             | O3    | 8            | 0.121 (3)  | 0.051 (4)  | 0.003 (23) | 1.000    | 0.02000          |
|             | O4    | 8            | 0.258 (3)  | 0.128 (3)  | 0.51 (4)   | 1.000    | 0.02000          |
|             | O5    | 8            | 0.014 (3)  | 0.278 (4)  | 0.96 (3)   | 1.000    | 0.02000          |
|             | O6    | 8            | 0.075 (2)  | 0.447 (3)  | 0.03 (2)   | 1.000    | 0.02000          |
|             | O7    | 8            | 0.815 (3)  | 0.356 (3)  | 0.04 (2)   | 1.000    | 0.02000          |

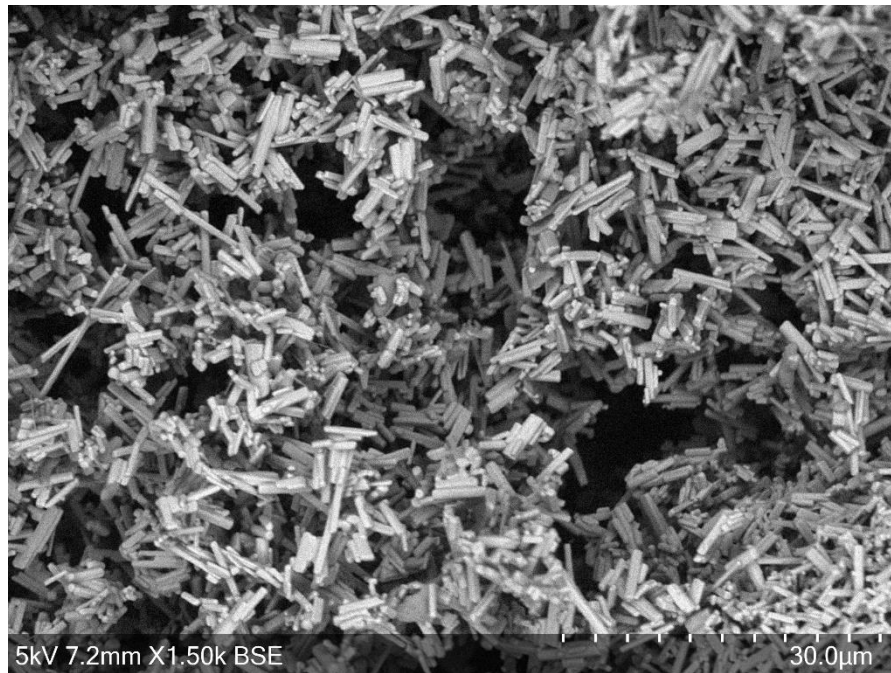

SI Figure 2: Scanning electron microscopy (SEM) image of NTMO71515.

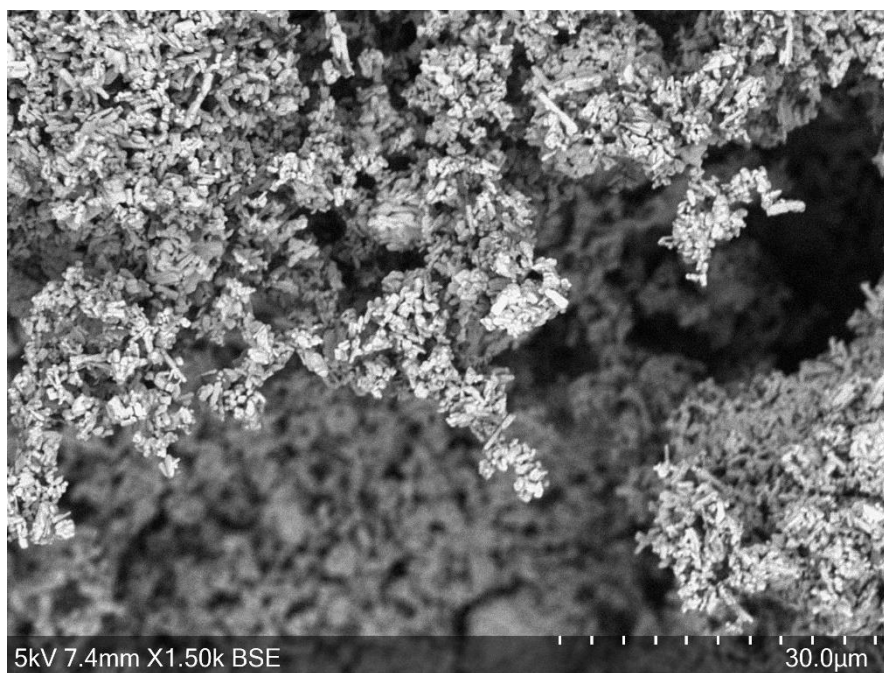

SI Figure 3: Scanning electron microscopy (SEM) image of TTMO71515.

SI Table 3: The corresponding capacity and calculated  $\text{Li}^+$  intercalation for each voltage range for the 3 formation cycles of NTMO71515

| NTMO71515 1 <sup>st</sup> Cycle |                                  |                           | NTMO71515 2 <sup>nd</sup> Cycle |                                  |                           | NTMO71515 3 <sup>rd</sup> Cycle |                                  |                           |
|---------------------------------|----------------------------------|---------------------------|---------------------------------|----------------------------------|---------------------------|---------------------------------|----------------------------------|---------------------------|
| Voltage Range (V)               | Capacity (mA h g <sup>-1</sup> ) | Amount of Li <sup>+</sup> | Voltage Range (V)               | Capacity (mA h g <sup>-1</sup> ) | Amount of Li <sup>+</sup> | Voltage Range (V)               | Capacity (mA h g <sup>-1</sup> ) | Amount of Li <sup>+</sup> |
| 2.20 – 2.00                     | 32                               | 1.5                       | 2.40 – 2.00                     | 26                               | 1.2                       | 2.40 – 2.00                     | 26                               | 1.2                       |
| 2.00 – 1.30                     | 193                              | 9.2                       | 2.00 – 1.30                     | 171                              | 8                         | 2.00 – 1.30                     | 167                              | 7.9                       |
| 1.30 – 1.00                     | 43                               | 2                         | 1.30 – 1.00                     | 36                               | 1.7                       | 1.30 – 1.00                     | 29                               | 1.4                       |
| <b>Total Li<sup>+</sup></b>     |                                  | 12.7                      | <b>Total Li<sup>+</sup></b>     |                                  | 10.9                      | <b>Total Li<sup>+</sup></b>     |                                  | 10.5                      |

SI Table 4: The corresponding capacity and calculated amount of  $\text{Li}^+$  intercalation for each voltage range for the 3 formation cycles of TTMO71515

| TTMO71515 1 <sup>st</sup> Cycle |                                  |                           | TTMO71515 2 <sup>nd</sup> Cycle |                                  |                           | TTMO71515 3 <sup>rd</sup> Cycle |                                  |                           |
|---------------------------------|----------------------------------|---------------------------|---------------------------------|----------------------------------|---------------------------|---------------------------------|----------------------------------|---------------------------|
| Voltage Range (V)               | Capacity (mA h g <sup>-1</sup> ) | Amount of Li <sup>+</sup> | Voltage Range (V)               | Capacity (mA h g <sup>-1</sup> ) | Amount of Li <sup>+</sup> | Voltage Range (V)               | Capacity (mA h g <sup>-1</sup> ) | Amount of Li <sup>+</sup> |
| 2.30 – 1.95                     | 31                               | 2.2                       | 2.30 – 1.70                     | 17                               | 1.2                       | 2.20 – 1.70                     | 17                               | 1.2                       |
| 1.95 – 1.55                     | 39                               | 2.7                       | 1.70 – 1.55                     | 15                               | 1.1                       | 1.70 – 1.55                     | 15                               | 1.1                       |
| 1.55 – 1.00                     | 70                               | 4.9                       | 1.55 – 1.00                     | 66                               | 4.6                       | 1.55 – 1.00                     | 63                               | 4.4                       |
| <b>Total Li<sup>+</sup></b>     |                                  | 9.8                       | <b>Total Li<sup>+</sup></b>     |                                  | 6.9                       | <b>Total Li<sup>+</sup></b>     |                                  | 6.7                       |

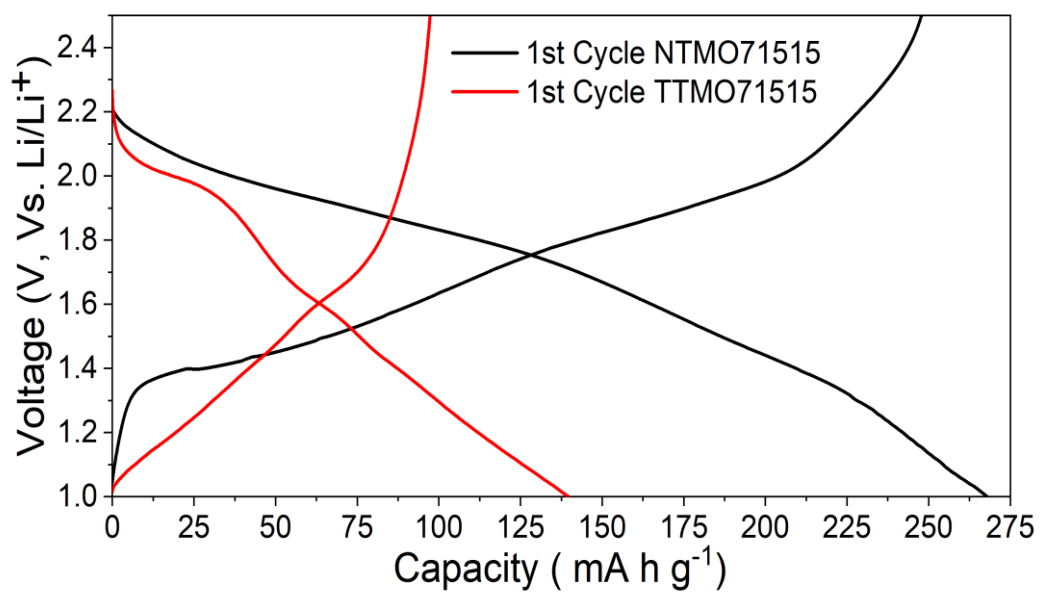

SI Figure 4: Galvanostatic discharge-charge curves for the 1<sup>st</sup> cycles of NTMO71515 and TTMO71515, with a current density of 0.01 A g<sup>-1</sup> applied.

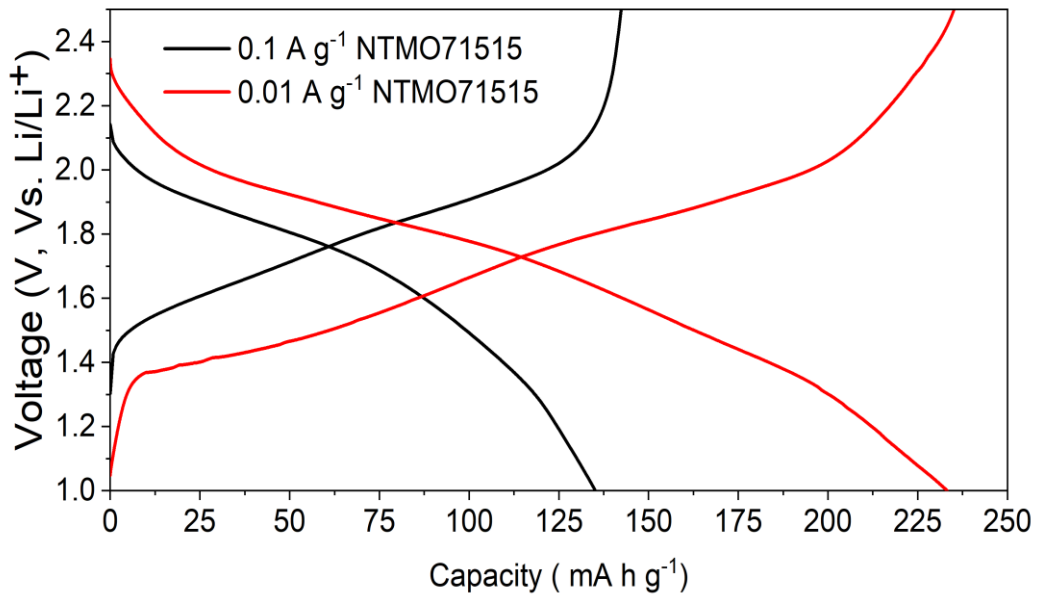

SI Figure 5: Galvanostatic discharge-charge curves for NTMO71515 at current densities of 0.01 and 0.1 A g<sup>-1</sup>.

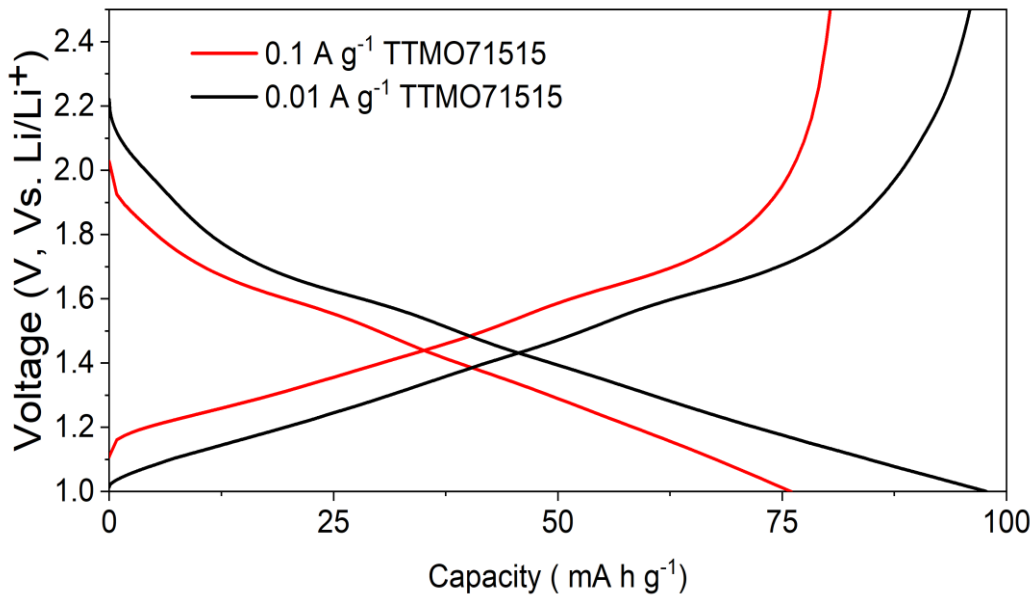

SI Figure 6: Galvanostatic discharge-charge curves for TTMO71515 at current densities of 0.01 and 0.1 A g<sup>-1</sup>.

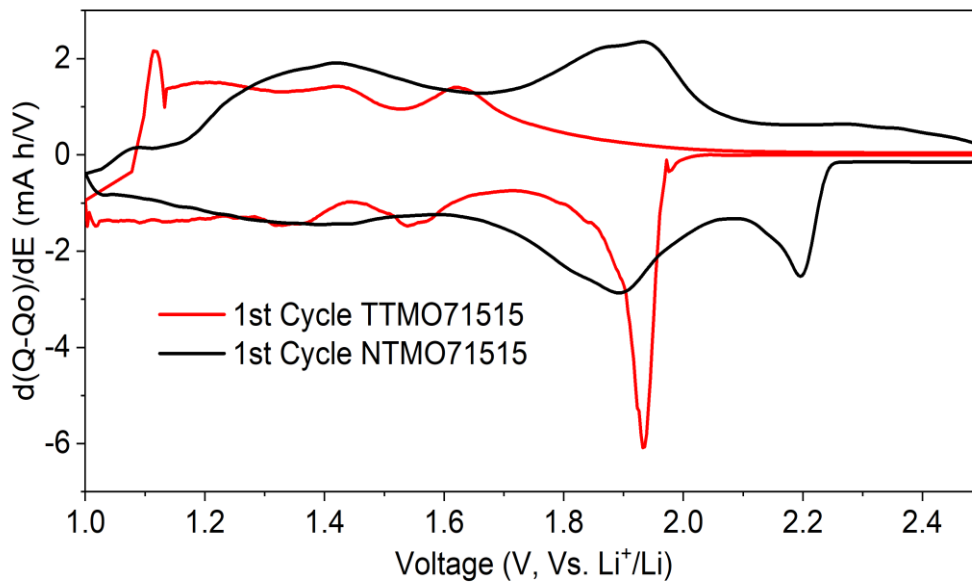

SI Figure 7:  $dQ/dV$  plots derived from the galvanostatic discharge-charge profiles of the 1<sup>st</sup> cycle comparing NTMO71515 and TTMO71515

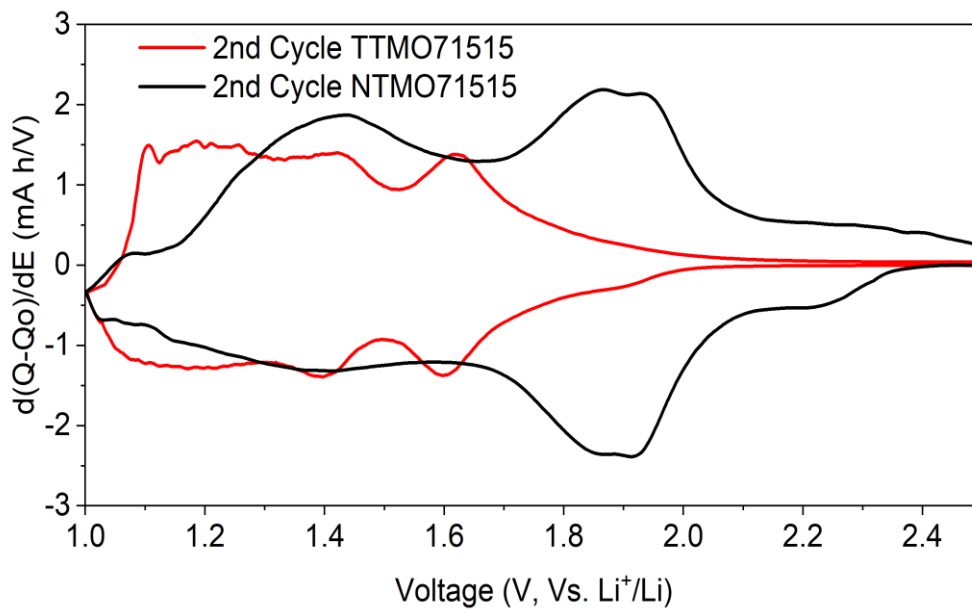

SI Figure 8:  $dQ/dV$  plots derived from the galvanostatic discharge-charge profiles of the 2<sup>nd</sup> cycle comparing NTMO71515 and TTMO71515

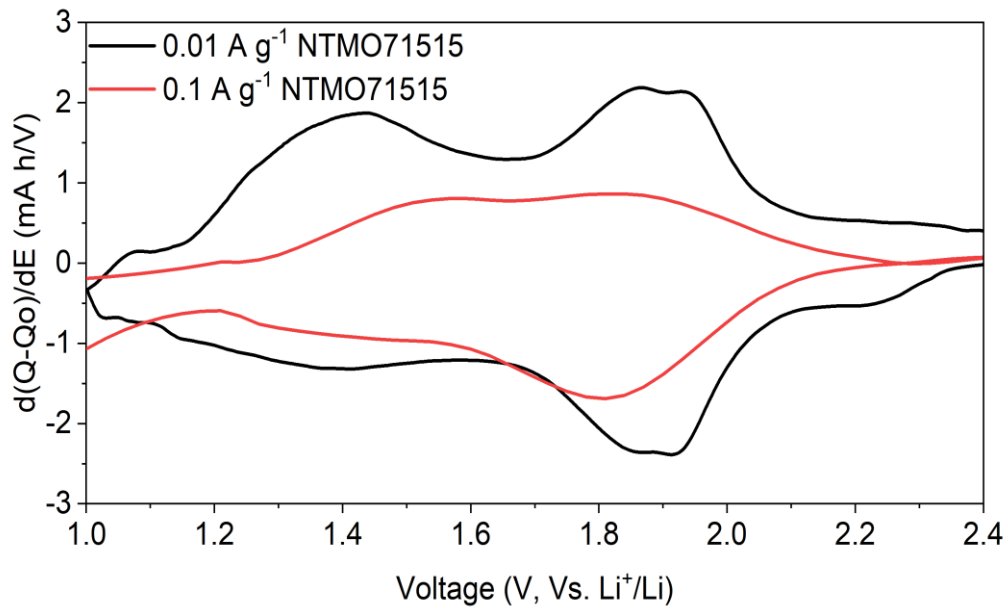

SI Figure 9:  $dQ/dV$  plots derived from the galvanostatic discharge-charge profiles of NTMO71515 at current densities of 0.01 and 0.1 A g<sup>-1</sup>.

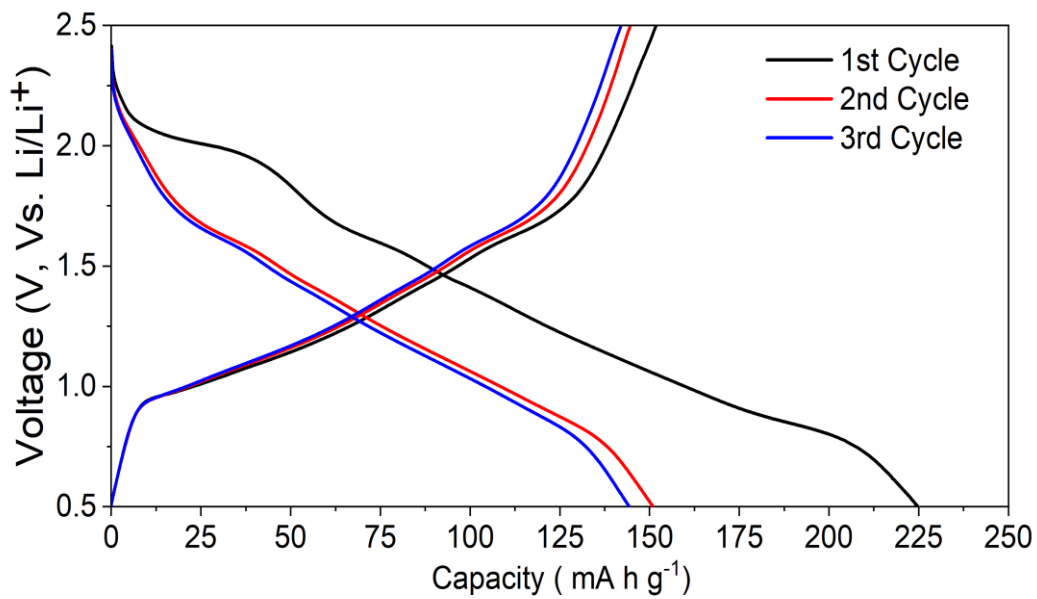

SI Figure 10: Galvanostatic discharge-charge curves for the 3 formation cycles at a current density of 0.01 A g<sup>-1</sup> between 0.5 -2.5 V for TMO71515



SI Table 5: The corresponding capacity and calculated  $\text{Li}^+$  intercalation for each voltage range for the 1<sup>st</sup> and 2<sup>nd</sup> formation cycles of the 0.5 – 2.5 V voltage study for TTMO71515

| TTMO71515 (2.5 – 0.5V) 1 <sup>st</sup> Cycle |                                  |                           | TTMO71515 (2.5 – 0.5V) 2 <sup>nd</sup> Cycle |                                  |                           |
|----------------------------------------------|----------------------------------|---------------------------|----------------------------------------------|----------------------------------|---------------------------|
| Voltage Range (V)                            | Capacity (mA h g <sup>-1</sup> ) | Amount of Li <sup>+</sup> | Voltage Range (V)                            | Capacity (mA h g <sup>-1</sup> ) | Amount of Li <sup>+</sup> |
| 2.40 – 2.00                                  | 32                               | 2.2                       | 2.40 – 1.60                                  | 36                               | 2.5                       |
| 2.00 – 0.85                                  | 158                              | 11.1                      | 1.60 – 0.80                                  | 97                               | 6.8                       |
| 0.85 – 0.50                                  | 35                               | 2.5                       | 0.80 – 0.50                                  | 18                               | 1.3                       |
| <b>Total Li<sup>+</sup></b>                  |                                  | 15.5                      | <b>Total Li<sup>+</sup></b>                  |                                  | 10.6                      |

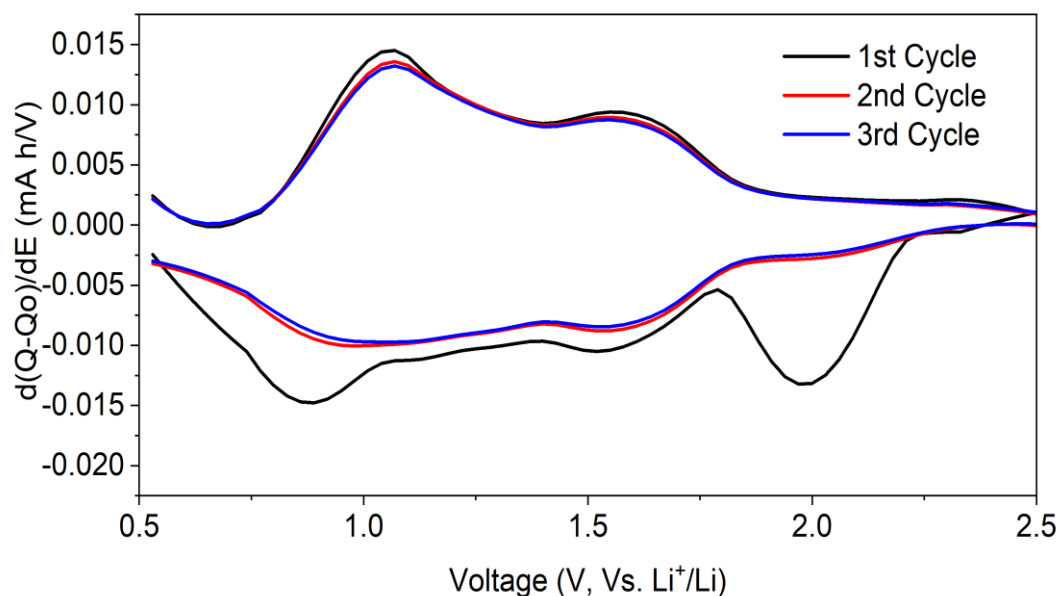

SI Figure 11:  $dQ/dV$  plots derived from the galvanostatic discharge-charge profiles for the 3 formation cycles at a current density of  $0.01 \text{ A g}^{-1}$  between 0.5 -2.5 V for TTMO71515

*SI Table 6: The average capacity retention between the 1<sup>st</sup> and the final (5th) delithiation cycle at different current densities for NTMO71515. The corresponding C-rate for each for each current density is also shown.*

| <b>NTMO71515</b>                          |               |                                                   |                                          |                               |
|-------------------------------------------|---------------|---------------------------------------------------|------------------------------------------|-------------------------------|
| <b>Current Density (A g<sup>-1</sup>)</b> | <b>C-rate</b> | <b>1<sup>st</sup> Cycle (mA h g<sup>-1</sup>)</b> | <b>Final Cycle (mA h g<sup>-1</sup>)</b> | <b>Capacity Retention (%)</b> |
| 0.1                                       | 0.4           | 151 (12)                                          | 150 (12)                                 | 99                            |
| 0.2                                       | 0.7           | 146 (13)                                          | 145 (11)                                 | 99                            |
| 0.4                                       | 1.5           | 140 (11)                                          | 143 (13)                                 | 98                            |
| 0.6                                       | 2.2           | 139 (13)                                          | 139 (10)                                 | 99                            |
| 1                                         | 3.7           | 134 (10)                                          | 138 (13)                                 | 98                            |
| 2                                         | 7.5           | 130 (13)                                          | 133 (10)                                 | 98                            |
| 4                                         | 14.9          | 114 (14)                                          | 115 (21)                                 | 99                            |
| 0.1                                       | 0.4           | 159 (14)                                          | 159 (11)                                 | 99                            |

*SI Table 7: The average capacity retention between the 1<sup>st</sup> and the final (5th) delithiation cycle at different current densities for TTMO71515. The corresponding C-rate for each for each current density is also shown.*

| <b>TTMO71515</b>                          |               |                                                   |                                          |                               |
|-------------------------------------------|---------------|---------------------------------------------------|------------------------------------------|-------------------------------|
| <b>Current Density (A g<sup>-1</sup>)</b> | <b>C-rate</b> | <b>1<sup>st</sup> Cycle (mA h g<sup>-1</sup>)</b> | <b>Final Cycle (mA h g<sup>-1</sup>)</b> | <b>Capacity Retention (%)</b> |
| 0.1                                       | 0.7           | 79 (2)                                            | 79 (3)                                   | 99                            |
| 0.2                                       | 1.4           | 78 (1)                                            | 78 (1)                                   | 99                            |
| 0.4                                       | 2.9           | 75 (2)                                            | 75 (2)                                   | 99                            |
| 0.6                                       | 4.3           | 74 (2)                                            | 75 (3)                                   | 99                            |
| 1                                         | 7.1           | 72 (2)                                            | 72 (2)                                   | 99                            |
| 2                                         | 14.3          | 68 (1)                                            | 68 (1)                                   | 99                            |
| 4                                         | 28.6          | 59 (1)                                            | 60 (2)                                   | 99                            |
| 0.1                                       | 0.7           | 80 (2)                                            | 80 (3)                                   | 99                            |

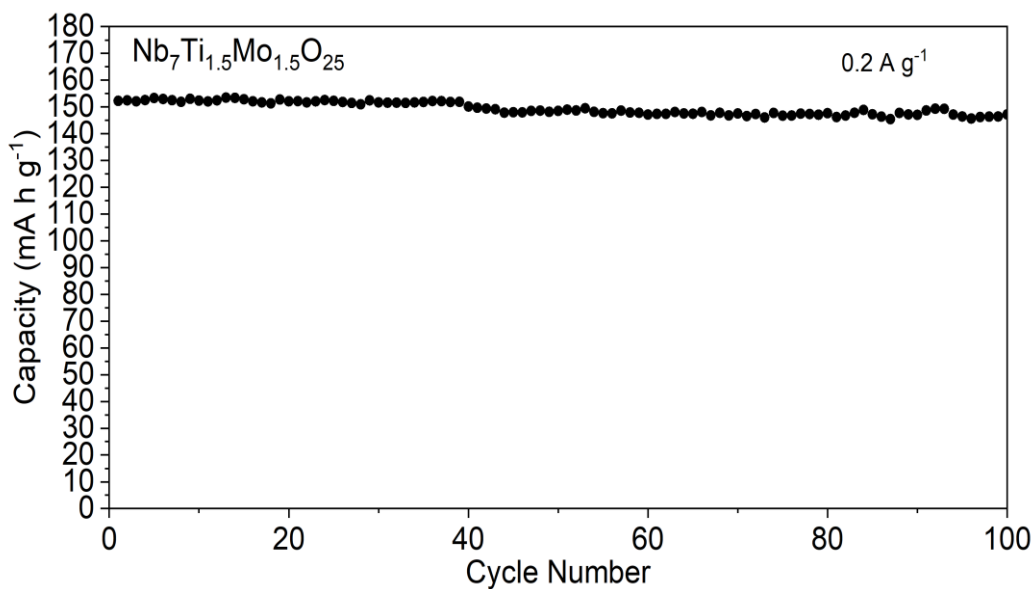

SI Figure 12: Long term cycling data for NTMO71515. 100 cycles were performed at a current density of 0.2 A g<sup>-1</sup>.

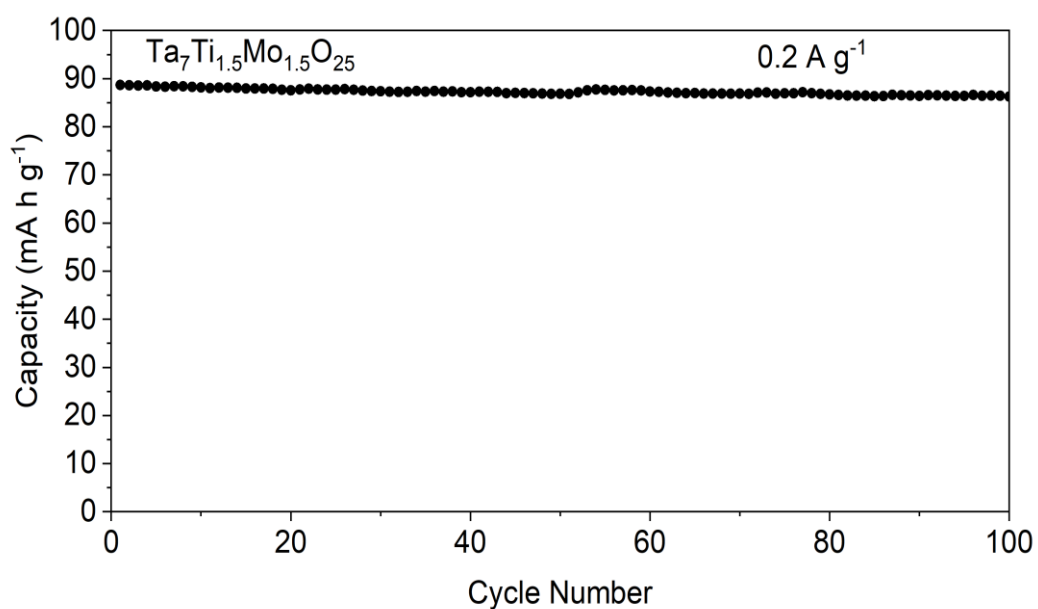

SI Figure 13: Long term cycling data for TTMO71515. 100 cycles were performed at a current density of 0.2 A g<sup>-1</sup>.

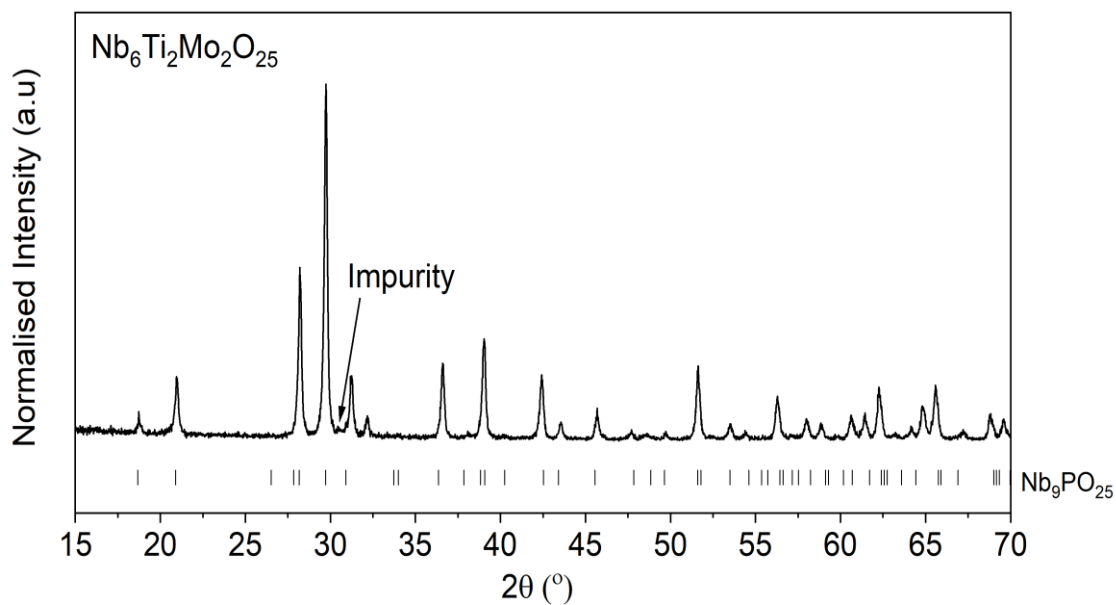

SI Figure 14: XRD pattern of NTMO622 and the observed minor impurity. Tick marks for the  $\text{Nb}_9\text{PO}_{25}$  phase (black dashes) have been added.

SI Table 8: The average capacity retention between the 1<sup>st</sup> and the final (5<sup>th</sup>) delithiation cycle at different current densities for NTMO65175175.

| NTMO65175175                          |        |                                                |                                      |                        |
|---------------------------------------|--------|------------------------------------------------|--------------------------------------|------------------------|
| Current Density ( $\text{A g}^{-1}$ ) | C-rate | 1 <sup>st</sup> Cycle ( $\text{mA h g}^{-1}$ ) | Final Cycle ( $\text{mA h g}^{-1}$ ) | Capacity Retention (%) |
| 0.1                                   | 0.3    | 171 (5)                                        | 170 (7)                              | 99                     |
| 0.2                                   | 0.7    | 160 (8)                                        | 161 (2)                              | 99                     |
| 0.4                                   | 1.4    | 154 (7)                                        | 156 (2)                              | 99                     |
| 0.6                                   | 2.1    | 150 (6)                                        | 151 (3)                              | 99                     |
| 1                                     | 3.4    | 143 (1)                                        | 142 (4)                              | 99                     |
| 2                                     | 6.9    | 138 (3)                                        | 138 (4)                              | 100                    |
| 4                                     | 13.8   | 118 (2)                                        | 106 (1)                              | 89                     |
| 0.1                                   | 0.3    | 264 (50)                                       | 167 (1)                              | 55                     |

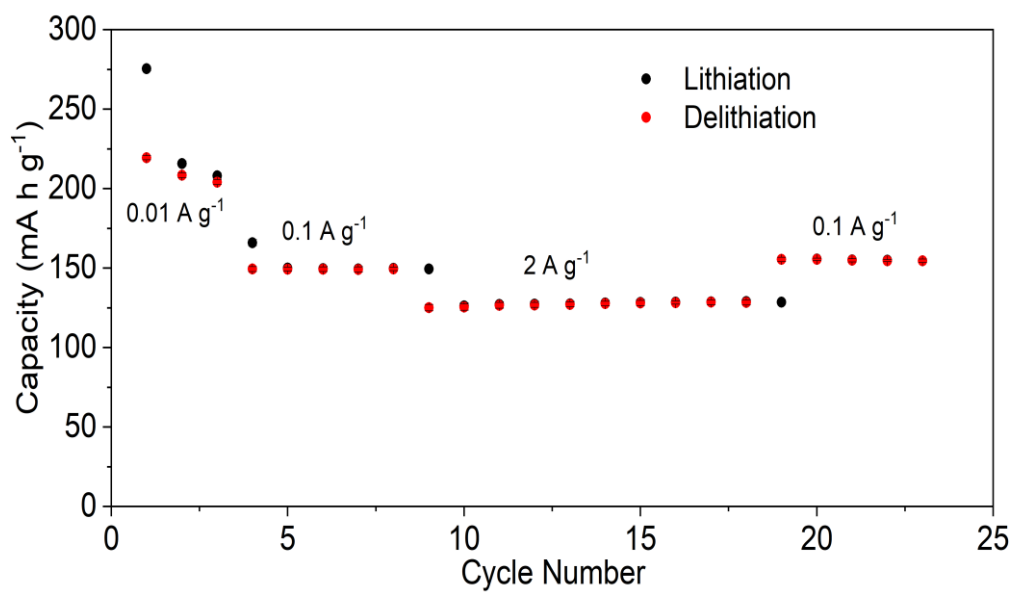

SI Figure 15: Average specific capacities of two NTMO71515 cells undergoing an alternative formation cycling involving a higher rate step - 3 cycles at  $0.01 \text{ A g}^{-1}$ , 5 cycles at  $0.1 \text{ A g}^{-1}$  and finally 10 cycles at  $2 \text{ A g}^{-1}$  – before going back to 5 cycles at  $0.1 \text{ A g}^{-1}$ .
